# Supplementary material for: Studies on phase stability, mechanical, optical and electronic properties of a new Gd2CaZnO5 phosphor system for LEDs
Source: Royal Society of Chemistry journal article supplement (doi:10.1039/c3ce42194e), 2013-12-04
Supplement: c3ce42194e.pdf [file c3ce42194e.pdf]

## Electronic Supplementary Information

### Studies on phase stability, mechanical, optical and electronic properties of a new $\text{Gd}_2\text{CaZnO}_5$ phosphor system for LEDs

Dongwei Xu,<sup>a</sup> D. Haranath,<sup>b\*</sup> Haiying He,<sup>c\*</sup> Savvi Mishra,<sup>b</sup> Deepika Yadav,<sup>b</sup> B. Sivaiah,<sup>b</sup> B. G. Bhasker,<sup>b</sup> N. Vijayan,<sup>b</sup> A. Dhar,<sup>b</sup> Jiajie Zhu,<sup>a</sup> Virendra Shanker,<sup>b</sup> and Ravindra Pandey<sup>a</sup>

#### Photoluminescence Studies:

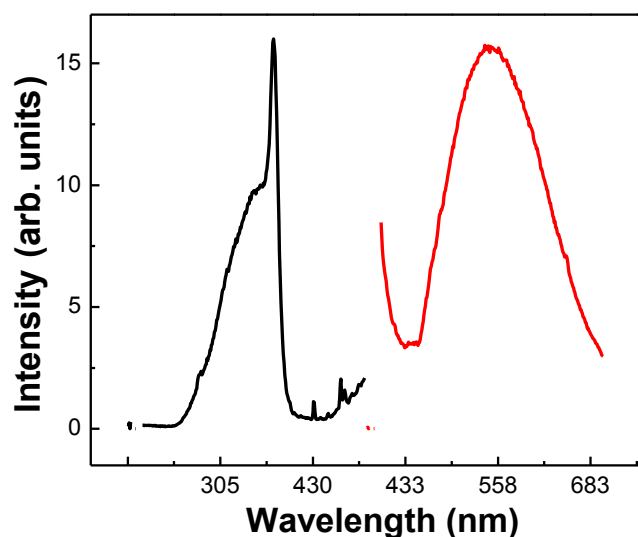

**Figure S1.** Photoluminescence excitation and emission spectra of  $\text{Gd}_2\text{CaZnO}_5$  phosphor when monitored under UV (377 nm) excitation. (Color figure online)

The photoluminescence excitation and emission spectra are recorded at room temperature using Edinburgh Luminescence Spectrometer (Model: F900) equipped with a xenon lamp. Spectra are monitored in the range 200-800 nm. Figure S1 shows the broad band emission spectrum of  $\text{Gd}_2\text{CaZnO}_5$  phosphor system with a maximum at ~560 nm upon UV (377 nm) excitation radiations. Broad emission of the undoped lattice could be attributed to the surface states and oxygen deficiency related defects.

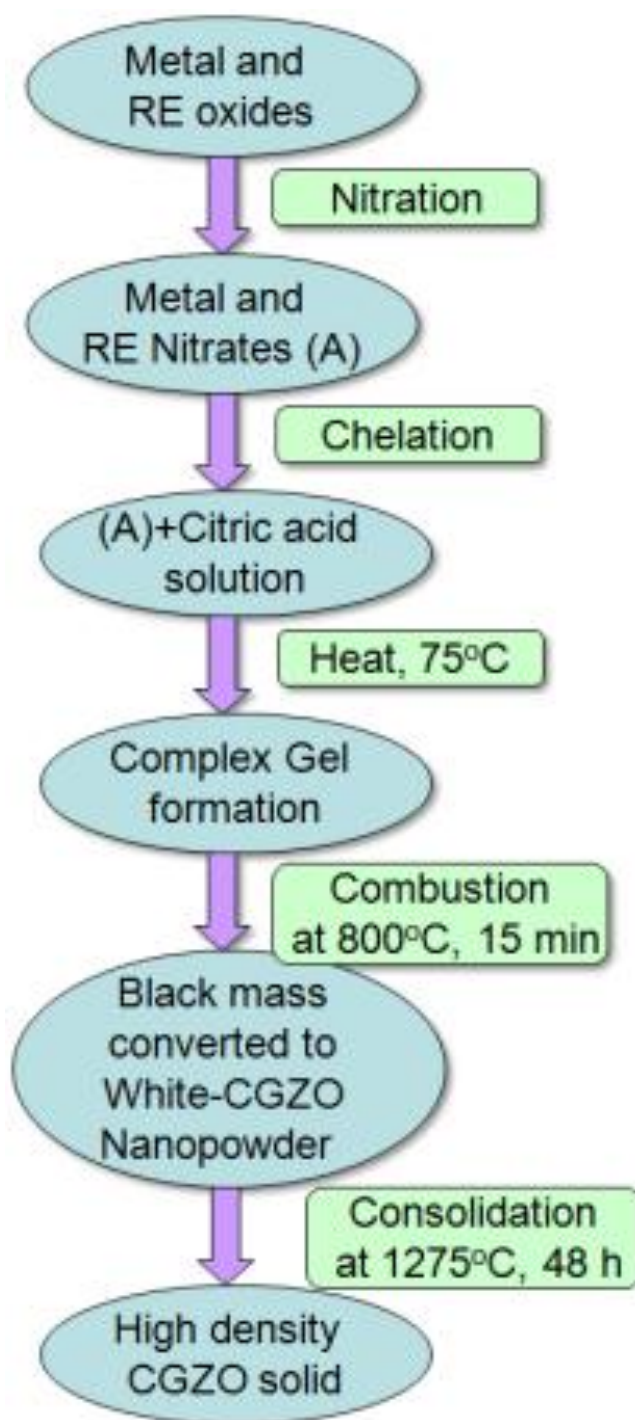

**Figure S2.** Flow chart depicting the step-by-step process of making  $\text{Gd}_2\text{CaZnO}_5$  phosphor system. (Color figure online)
